# Supplementary material
Source: publisher figshare collection journal article supplement (https://karger.figshare.com/ndownloader/files/9703120)
Supplement: Supplementary file 1 [file 9703120]

**Suppl. Table 2: Distribution of the analyzed primary and metastatic tissue of the 18 patients in the immunohistochemistry study.**

| **IHC specimens** | | **tissue type** | | **total** |
| --- | --- | --- | --- | --- |
| **primary tumor** | **metastases** |
| **Patient #** | 50 | 1 | 0 | 1 |
| 57 | 1 | 0 | 1 |
| 102 | 0 | 1 | 1 |
| 110 | 1 | 0 | 1 |
| 113 | 1 | 0 | 1 |
| 115 | 1 | 0 | 1 |
| 116 | 0 | 1 | 1 |
| 125 | 1 | 0 | 1 |
| 129 | 1 | 0 | 1 |
| 143 | 1 | 0 | 1 |
| 148 | 1 | 0 | 1 |
| 155 | 1 | 0 | 1 |
| 162 | 1 | 0 | 1 |
| 165 | 0 | 1 | 1 |
| 168 | 1 | 0 | 1 |
| 170 | 1 | 0 | 1 |
| 171 | 1 | 0 | 1 |
| 179 | 0 | 1 | 1 |
| **total** | | **14** | **4** | **18** |
